# Supplementary material for: Engineering two-photon high-dimensional states through quantum interference
Source: PubMed Central journal article supplement — Sci Adv. 2016 Feb 26;2(2):e1501165. doi: 10.1126/sciadv.1501165 (PMC4771439; doi:10.1126/sciadv.1501165), 2016-02-26
Supplement: 1501165_SM.pdf [file 1501165_SM.pdf]

# Science Advances

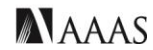

[advances.sciencemag.org/cgi/content/full/2/2/e1501165/DC1](http://advances.sciencemag.org/cgi/content/full/2/2/e1501165/DC1)

## Supplementary Materials for

### **Engineering two-photon high-dimensional states through quantum interference**

Yingwen Zhang, Filippus S. Roux, Thomas Konrad, Megan Agnew, Jonathan Leach, Andrew Forbes

Published 26 February 2016, *Sci. Adv.* **2**, e1501165 (2016)

DOI: 10.1126/sciadv.1501165

#### **The PDF file includes:**

Text

Any input state of a 50:50 beamsplitter with one photon incident on each input port can be decomposed into a component that generates coincidence counts and an orthogonal component which does not generate coincidence counts. In order to show this, let us consider a set of photonic modes with creation operators  $a_i^\dagger$  and  $b_j^\dagger$ . These act on the two input paths  $A, B$  and the output paths  $A', B'$  (Fig. 1). The creation operator  $a_i^\dagger$  acting on the vacuum state  $|0\rangle$  creates a single photon in mode  $i$  and path  $A$  (or  $A'$ ), i.e.,  $a_i^\dagger|0\rangle = |1_i\rangle_A$ ; there is an analogous relation for creation operator  $b_j^\dagger$ . Any input state of the beamsplitter with one photon in each input port can then be written as

$$|\Psi\rangle = \sum_{i,j=1}^d \alpha_{ij} |1_i\rangle_A |1_j\rangle_B = \sum_{i,j=1}^d \alpha_{ij} a_i^\dagger b_j^\dagger |0\rangle \quad (\text{S1})$$

with complex coefficients  $\alpha_{ij}$  that are normalized, i.e.,  $\sum_{i,j} |\alpha_{i,j}|^2 = 1$ . States  $|s^+\rangle$  that do not change when the modes in path  $A$  and path  $B$  are swapped ( $|s^+\rangle \rightarrow |s^+\rangle$ ) are called symmetric, while states  $|s^-\rangle$  which acquire with this swap a  $\pi$  phase shift ( $|s^-\rangle \rightarrow -|s^-\rangle$ ) are called antisymmetric:

$$\begin{aligned} |s^\pm\rangle &= \sum_{i,j=1}^d c_{ij}^{(\pm)} a_i^\dagger b_j^\dagger |0\rangle \\ &= \sum_{i>j=1}^d c_{ij}^{(\pm)} (a_i^\dagger b_j^\dagger \pm a_j^\dagger b_i^\dagger) |0\rangle + \sum_{i=1}^d c_{ii}^{(+)} a_i^\dagger b_i^\dagger |0\rangle \end{aligned} \quad \text{with } c_{ij}^{(\pm)} = \pm c_{ji}^{(\pm)}. \quad (\text{S2})$$

Although the input state in Eq. (S1) is in general neither symmetric nor antisymmetric, it can be expressed by a basis consisting of symmetric states  $|s_{ij}^+\rangle$  and antisymmetric states  $|s_{ij}^-\rangle$  given by

$$|s_{ij}^+\rangle = \frac{1}{\sqrt{2}} (a_i^\dagger b_j^\dagger \pm a_j^\dagger b_i^\dagger) |0\rangle \quad \text{for } i \neq j, \quad (\text{S3})$$

$$\text{and } |s_{ii}^+\rangle = a_i^\dagger b_i^\dagger |0\rangle, \quad |s_{ii}^-\rangle = 0. \quad (\text{S4})$$

This can be easily seen from inserting the identities.  $a_i^\dagger b_j^\dagger |0\rangle \equiv (|s_{ij}^+\rangle + |s_{ij}^-\rangle)/\sqrt{2}$  and  $a_i^\dagger b_i^\dagger |0\rangle \equiv |s_{ii}^+\rangle$  into Eq. (S1):

$$\begin{aligned} |\Psi\rangle &= \sum_{i \neq j} \frac{\alpha_{ij}}{\sqrt{2}} (|s_{ij}^+\rangle + |s_{ij}^-\rangle) + \sum_i \alpha_{ii} |s_{ii}^+\rangle \\ &= \frac{1}{\sqrt{2}} \sum_{i>j} (\alpha_{ij} + \alpha_{ji}) |s_{ij}^+\rangle + (\alpha_{ij} - \alpha_{ji}) |s_{ij}^-\rangle + \sum_i \alpha_{ii} |s_{ii}^+\rangle, \\ &= |s^+\rangle + |s^-\rangle \end{aligned} \quad (\text{S5})$$

where the symmetric part  $|s^+\rangle$  and the antisymmetric part  $|s^-\rangle$  are given by Eq. (S2) with  $c_{ij}^{(\pm)} = (\alpha_{ij} \pm \alpha_{ji})/2$ . Both vectors are unnormalized.

Note that there are  $d(d-1)/2$  mutually orthogonal symmetric basis states,  $|s_{ij}^+\rangle$  with  $i \neq j$  and the same number of mutually orthogonal antisymmetric states  $|s_{ij}^-\rangle$ . However, there are also  $d$  symmetric basis states with  $i = j$ , completing the total number of basis states to  $d^2$ , the dimension of Hilbert space of the input states with one  $d$ -level photon in each of two paths.

Under the action of a 50:50 beam splitter inducing the transformation

$$\begin{aligned} a_i^\dagger b_j^\dagger &\rightarrow \frac{1}{2}(a_i^\dagger + b_i^\dagger)(a_j^\dagger - b_j^\dagger) \\ &= \frac{1}{2}(a_i^\dagger a_j^\dagger + a_j^\dagger b_i^\dagger - a_i^\dagger b_j^\dagger - b_i^\dagger b_j^\dagger) \end{aligned} \quad , \quad (\text{S6})$$

the symmetric part of the input state  $|\Psi\rangle$  is mapped onto a superposition of states with two photons in one of the paths:

$$\begin{aligned} |s^+\rangle &= \frac{1}{2} \sum_{i>j} (\alpha_{ij} + \alpha_{ji}) (a_i^\dagger b_j^\dagger + a_j^\dagger b_i^\dagger) |0\rangle + \sum_i \alpha_{ii} a_i^\dagger b_i^\dagger |0\rangle \\ &\rightarrow \frac{1}{2} \sum_{i \geq j} \left(1 - \frac{\delta_{ij}}{2}\right) (\alpha_{ij} + \alpha_{ji}) (a_i^\dagger a_j^\dagger - b_i^\dagger b_j^\dagger) |0\rangle \\ &= \frac{1}{2} \sum_{i>j} (\alpha_{ij} + \alpha_{ji}) (|1_i, 1_j\rangle_{A'} |0\rangle_{B'} - |0\rangle_{A'} |1_i, 1_j\rangle_{B'}) + \frac{1}{\sqrt{2}} \sum_{i=0}^d \alpha_{ii} (|2_i\rangle_{A'} |0\rangle_{B'} - |0\rangle_{A'} |2_i\rangle_{B'}) \end{aligned} \quad . \quad (\text{S7})$$

On the other hand, the antisymmetric part  $|s^-\rangle$  of the input state does not change under the action of the beamsplitter:

$$\begin{aligned} |s^-\rangle &= \frac{1}{2} \sum_{i>j} (\alpha_{ij} - \alpha_{ji}) (a_i^\dagger b_j^\dagger - a_j^\dagger b_i^\dagger) |0\rangle \\ &\rightarrow \frac{1}{2} \sum_{i \geq j} (\alpha_{ij} - \alpha_{ji}) (a_j^\dagger b_i^\dagger - a_i^\dagger b_j^\dagger) |0\rangle \quad , \quad (\text{S8}) \\ &= \frac{1}{2} \sum_{i>j} (\alpha_{ij} - \alpha_{ji}) (|1_i\rangle_{A'} |1_j\rangle_{B'} - |1_j\rangle_{A'} |1_i\rangle_{B'}) \end{aligned}$$

Hence, the symmetric part  $|s^+\rangle$  produces no component with single photons in the output ports and thus no coincidence counts while the antisymmetric part stays invariant ( $|s^-\rangle \rightarrow |s^-\rangle$ ) and thus yields only coincidence counts. When conditioning on coincidence counts in the output ports of the beamsplitter, it thus acts as a filter that projects onto the

antisymmetric component  $|s^-\rangle$ . The success probability  $p$  for this projection is given by the square of the norm of the antisymmetric part, i.e.,  $p = \langle s^- | s^- \rangle = \sum_{i>j} |\alpha_{ij} - \alpha_{ji}|^2 / 2$ .
